# Supplementary material for: Comparative genomics of nuclear envelope proteins
Source: PubMed Central journal article supplement (PMC6240307; doi:10.1186/s12864-018-5218-4), 2018-11-16
Supplement: 12864_2018_5218_MOESM1_ESM.pdf [file 12864_2018_5218_MOESM1_ESM.pdf]

**Additional file 1:**

**Figures S1 - S5**

**Tables S1, S2**

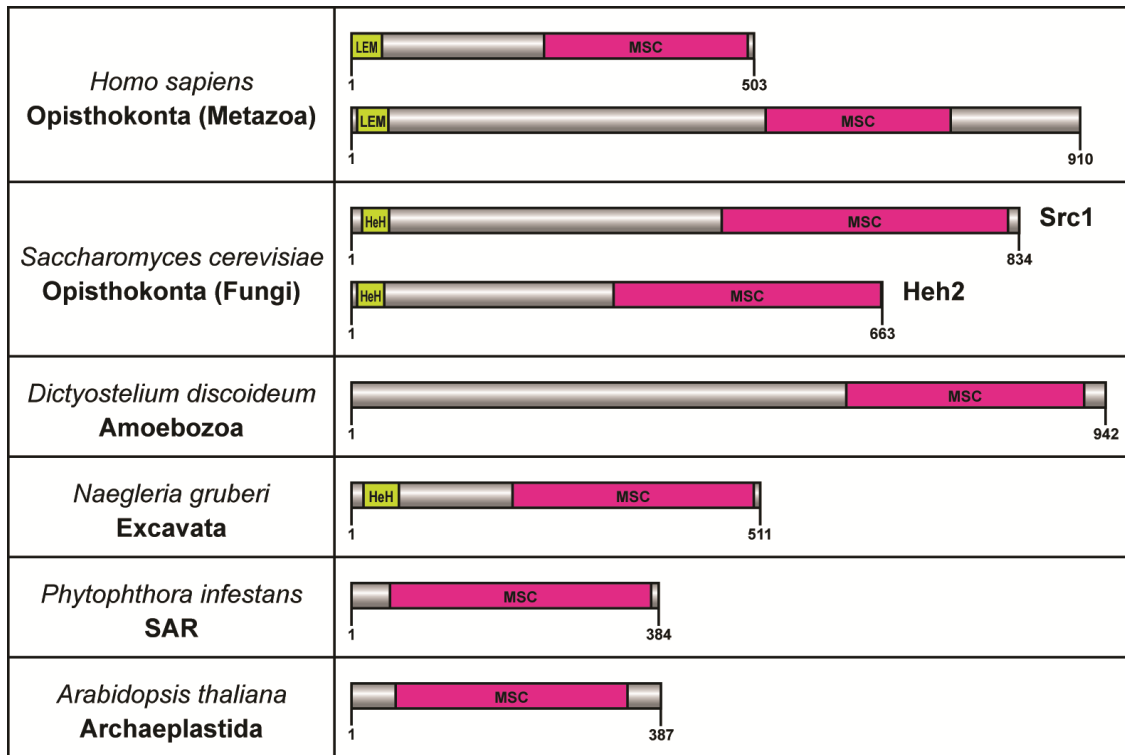

**Figure S1: Domain organization in Heh2 and Src1 proteins.** The domain architectures of the homologs of Heh2 and Src1 proteins are shown in representative organisms from each eukaryotic supergroup. MSC domain is shown in pink and the N-terminal HeH/LEM domain is shown in green. All maps are drawn to scale.

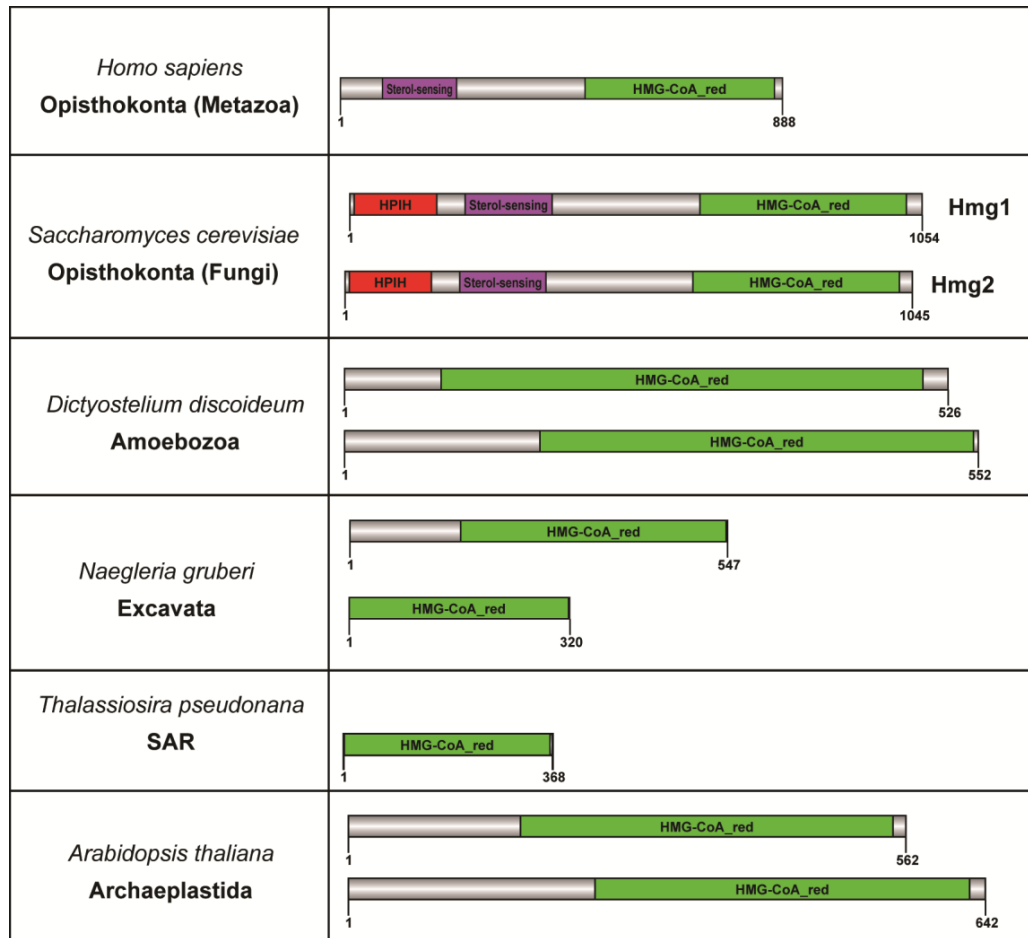

**Figure S2: Domain organization in Hmg1 & Hmg2 proteins.** Homologs of Hmg1 and Hmg2 proteins are shown in representative organisms. The domains found in each of the homologs are shown in different colors. HMG-CoA\_red (green), sterol-sensing (purple), HPIH (red). The homolog in *Thalassiosira pseudonana* with HMG-CoA\_red domain is partial. All maps are drawn to scale.

A

## Mps3

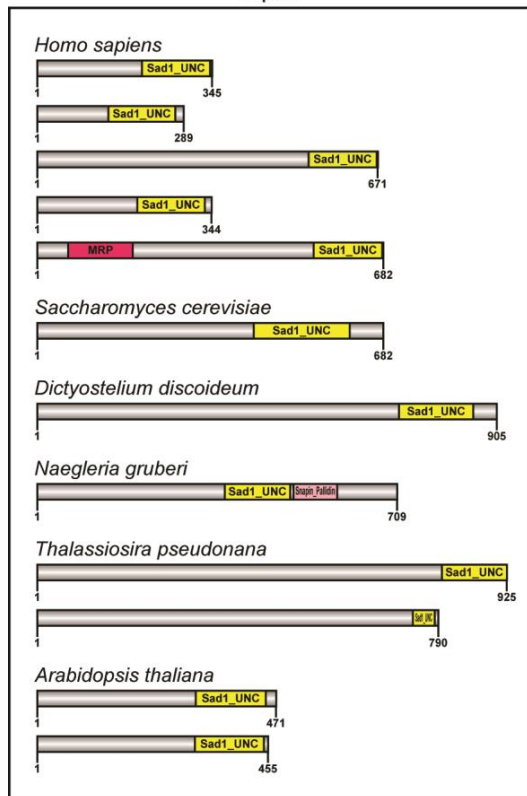

B

## Slp1

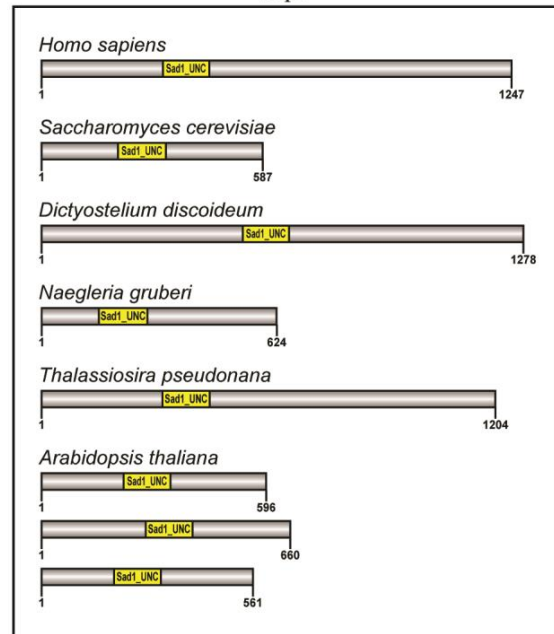

**Figure S3: Domain organization in the SUN domain proteins.** The domain architectures of the homologs of SUN domain containing proteins A) Mps3 (C-terminal SUN) and B) Slp1 (mid-SUN) are shown in representative organisms. Sad1\_UNC domain is shown in yellow. The additional MRP domain found in Mps3 homolog of human is shown in dark pink.

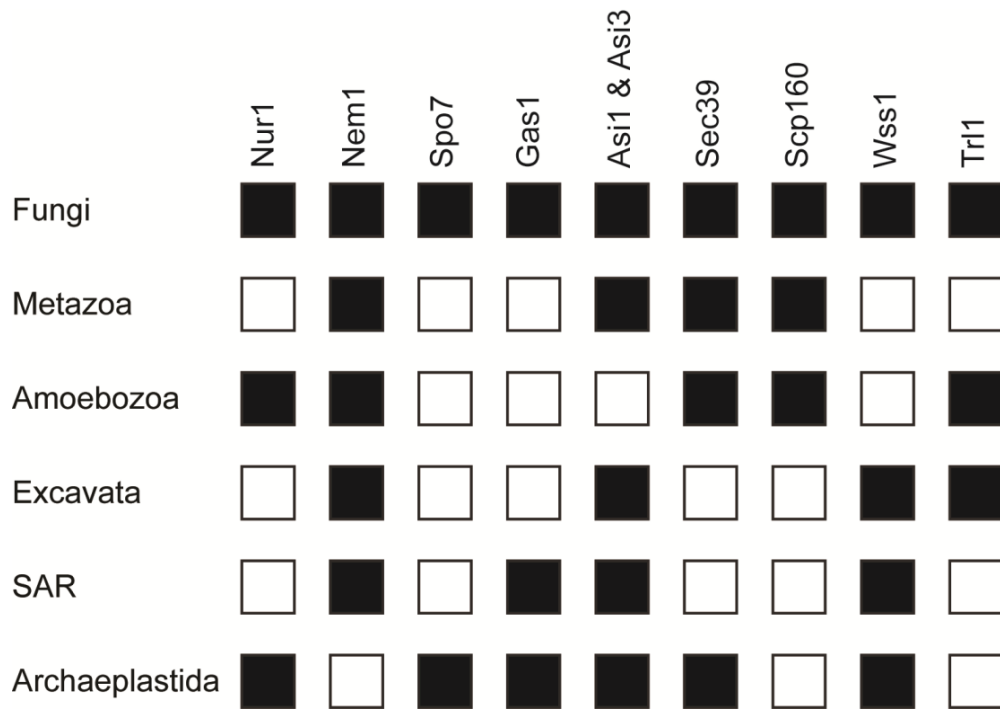

**Figure S4: Non-linearly conserved proteins.** The occurrence of non-linearly conserved proteins across supergroups is depicted. The black filled rectangles represent the presence of the protein in the respective supergroup. Fungi and Metazoa, belonging to Opisthokonta, are shown separately.

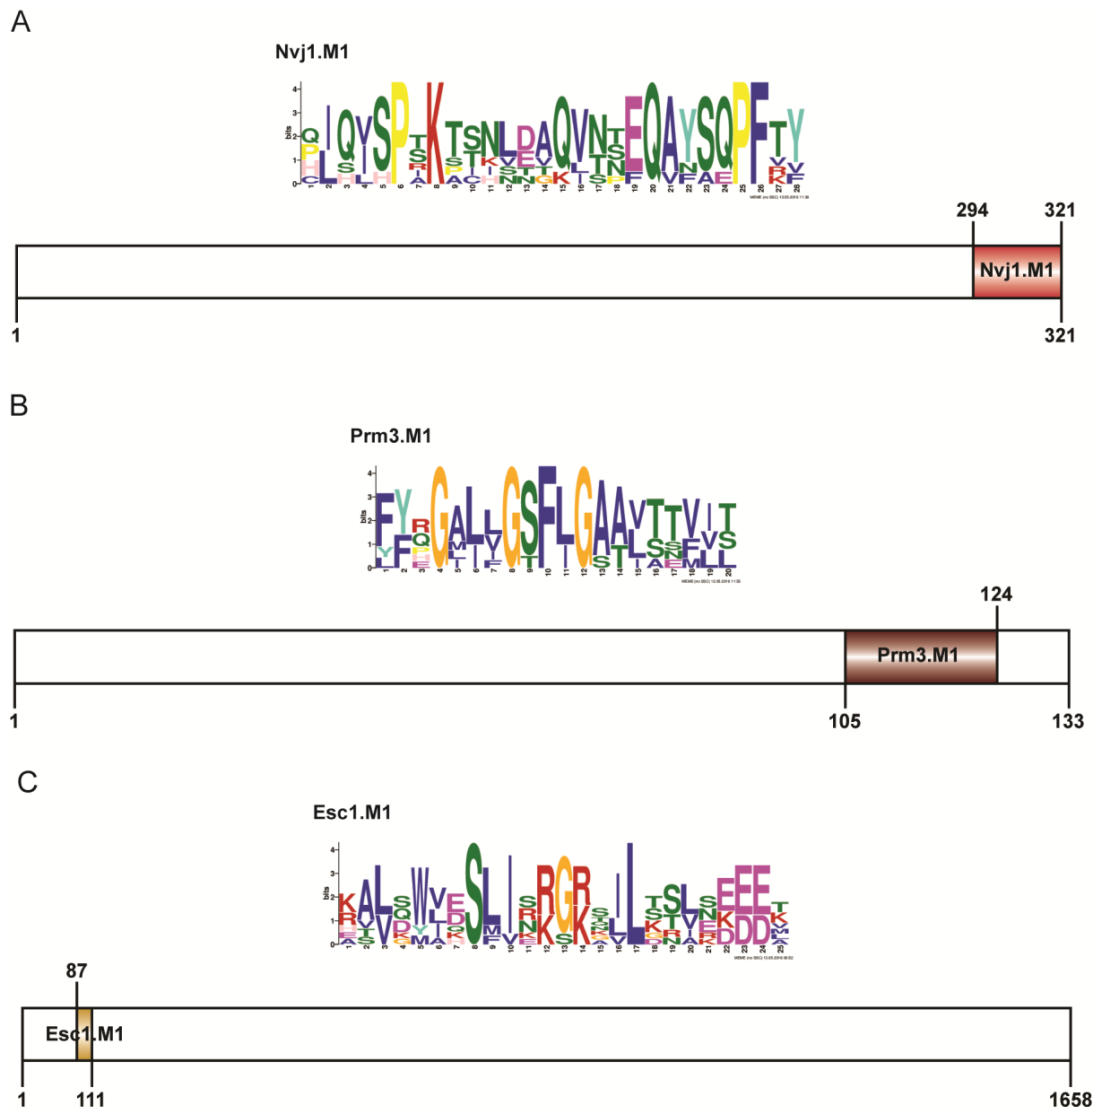

**Figure S5: Motifs identified in *Saccharomyces* specific proteins.** The sequence logos of the motifs identified in A) Nvj1, B) Prm3 and C) Esc1 are shown. Shown below is the scaled map of the *S. cerevisiae* protein indicating the position of the motif.

**Table S1: Nuclear envelope proteome of *Saccharomyces cerevisiae***

| <b>S. No</b> | <b>Protein</b> | <b>Functional class</b>      | <b>Localisation</b> |
|--------------|----------------|------------------------------|---------------------|
| 1            | Ebp2           | Chromatin organisation       | Nuclear periphery   |
| 2            | Rrs1           | Chromatin organisation       | Nuclear periphery   |
| 3            | Mps3           | Chromatin organisation       | INM                 |
| 4            | Heh2           | Chromatin organisation       | INM                 |
| 5            | Src1           | Chromatin organisation       | INM                 |
| 6            | Nur1           | Chromatin organisation       | Nuclear periphery   |
| 7            | Esc1           | Chromatin organisation       | Nuclear periphery   |
| 8            | Hmg1           | Nuclear envelope homeostasis | ER & ONM            |
| 9            | Hmg2           | Nuclear envelope homeostasis | ER & ONM            |
| 10           | Pct1           | Nuclear envelope homeostasis | ER & ONM            |
| 11           | Nem1           | Nuclear envelope homeostasis | ER & NE             |
| 12           | Spo7           | Nuclear envelope homeostasis | ER & NE             |
| 13           | Brr6           | Nuclear envelope homeostasis | ER & NE             |
| 14           | Brl1           | Nuclear envelope homeostasis | ER & NE             |
| 15           | Apq12          | Nuclear envelope homeostasis | ER & NE             |
| 16           | Ulp1           | Gene Regulation              | Nuclear pore        |
| 17           | Ssm4           | Gene Regulation              | ER & INM            |
| 18           | Rrt12          | Gene Regulation              | ER & NE             |
| 19           | Gas1           | Gene Regulation              | Nuclear periphery   |
| 20           | Asi1           | Gene Regulation              | INM                 |
| 21           | Asi2           | Gene Regulation              | INM                 |
| 22           | Asi3           | Gene Regulation              | INM                 |
| 23           | Cse1           | Transport related            | Nuclear pore        |
| 24           | Ntf2           | Transport related            | Nuclear pore        |
| 25           | Thp1           | Transport related            | Nuclear pore        |
| 26           | Pml39          | Transport related            | Nuclear pore        |
| 27           | Sec39          | Transport related            | NE & ER             |
| 28           | Pga2           | Transport related            | NE & ER             |
| 29           | Has1           | Others                       | NE                  |
| 30           | Ptc7           | Others                       | INM                 |
| 31           | Trm1           | Others                       | INM                 |
| 32           | Jem1           | Others                       | ER & ONM            |
| 33           | Slp1           | Others                       | ER & ONM            |
| 34           | Scp160         | Others                       | ER & ONM            |
| 35           | Wss1           | Others                       | NE                  |
| 36           | Trl1           | Others                       | INM                 |
| 37           | Gtt3           | Others                       | Nuclear periphery   |
| 38           | Uip4           | Others                       | ER & NE             |
| 39           | Mps2           | Others                       | NE                  |
| 40           | Nbp1           | Others                       | INM                 |
| 41           | Ypr174c        | Others                       | NE                  |
| 42           | Nvj1           | Others                       | NE                  |

|    |      |        |     |
|----|------|--------|-----|
| 43 | Prm3 | Others | ONM |
| 44 | Cos8 | Others | NE  |
| 45 | Uip3 | Others | NE  |

The proteins present at the nuclear envelope of *Saccharomyces cerevisiae* are listed along with the functional class to which they belong and their specific localization.

**Table S2: List of organisms used in the study**

| S. No | Organism                             | Phylum/Class/Common name | Eukaryotic Supergroup | Proteome Downloaded on |
|-------|--------------------------------------|--------------------------|-----------------------|------------------------|
| 1     | <i>Caenorhabditis elegans</i>        | Nematode                 | Opisthokonta          | 29/09/2015             |
| 2     | <i>Drosophila melanogaster</i>       | Fruit fly                | Opisthokonta          | 29/09/2015             |
| 3     | <i>Anopheles gambiae str. PEST</i>   | Mosquito                 | Opisthokonta          | 29/09/2015             |
| 4     | <i>Ciona intestinalis</i>            | Tunicate                 | Opisthokonta          | 29/09/2015             |
| 5     | <i>Danio rerio</i>                   | Zebrafish                | Opisthokonta          | 29/09/2015             |
| 6     | <i>Takifugu rubripes</i>             | Pufferfish               | Opisthokonta          | 29/09/2015             |
| 7     | <i>Anolis carolinensis</i>           | Green anole lizard       | Opisthokonta          | 29/09/2015             |
| 8     | <i>Gallus gallus</i>                 | Chicken                  | Opisthokonta          | 30/09/2015             |
| 9     | <i>Ornithorhynchus anatinus</i>      | Platypus                 | Opisthokonta          | 29/09/2015             |
| 10    | <i>Monodelphis domestica</i>         | Opossum                  | Opisthokonta          | 29/09/2015             |
| 11    | <i>Canis lupus familiaris</i>        | Dog                      | Opisthokonta          | 30/09/2015             |
| 12    | <i>Sus scrofa</i>                    | Pig                      | Opisthokonta          | 30/09/2015             |
| 13    | <i>Mus musculus</i>                  | Mouse                    | Opisthokonta          | 29/09/2015             |
| 14    | <i>Pan troglodytes</i>               | Chimpanzee               | Opisthokonta          | 30/09/2015             |
| 15    | <i>Homo sapiens</i>                  | Human                    | Opisthokonta          | 28/09/2015             |
| 16    | <i>Strongylocentrotus purpuratus</i> | Sea urchin               | Opisthokonta          | 29/09/2015             |
| 17    | <i>Amphimedon queenslandica</i>      | Sponge                   | Opisthokonta          | 29/09/2015             |
| 18    | <i>Arthroderma otae CBS 113480</i>   | Eurotiomycetes           | Opisthokonta          | 28/09/2015             |
| 19    | <i>Aspergillus nidulans FGSC A4</i>  | Eurotiomycetes           | Opisthokonta          | 28/09/2015             |
| 20    | <i>Neosartorya fischeri NRRL 181</i> | Eurotiomycetes           | Opisthokonta          | 28/09/2015             |
| 21    | <i>Leptosphaeria maculans JN3</i>    | Dothideomycetes          | Opisthokonta          | 28/09/2015             |
| 22    | <i>Parastagonospora nodorum SN15</i> | Dothideomycetes          | Opisthokonta          | 28/09/2015             |
| 23    | <i>Botrytis cinerea B05.10</i>       | Leotiomycetes            | Opisthokonta          | 28/09/2015             |



|    |                                                                |                       |              |            |
|----|----------------------------------------------------------------|-----------------------|--------------|------------|
| 24 | <i>Sclerotinia sclerotiorum</i> 1980 UF-70                     | Leotiomycetes         | Opisthokonta | 28/09/2015 |
| 25 | <i>Chaetomium globosum</i> CBS 148.51                          | Sordariomycetes       | Opisthokonta | 28/09/2015 |
| 26 | <i>Thielavia terrestris</i> NRRL 8126                          | Sordariomycetes       | Opisthokonta | 28/09/2015 |
| 27 | <i>Neurospora crassa</i> OR74A                                 | Sordariomycetes       | Opisthokonta | 28/09/2015 |
| 28 | <i>Tuber melanosporum</i> Mel28                                | Pezizomycetes         | Opisthokonta | 28/09/2015 |
| 29 | <i>Candida glabrata</i> CBS 138                                | Saccharomycetes       | Opisthokonta | 28/09/2015 |
| 30 | <i>Zygosaccharomyces rouxii</i> CBS 732                        | Saccharomycetes       | Opisthokonta | 28/09/2015 |
| 31 | <i>Kluyveromyces lactis</i> NRRL Y-1140                        | Saccharomycetes       | Opisthokonta | 28/09/2015 |
| 32 | <i>Schizosaccharomyces pombe</i> 972h-                         | Schizosaccharomycetes | Opisthokonta | 28/09/2015 |
| 33 | <i>Agaricus bisporus</i> var. <i>bisporus</i> H97              | Agaricomycetes        | Opisthokonta | 28/09/2015 |
| 34 | <i>Schizophyllum commune</i> H4-8                              | Agaricomycetes        | Opisthokonta | 29/09/2015 |
| 35 | <i>Trametes versicolor</i> FP-101664 SS1                       | Agaricomycetes        | Opisthokonta | 29/09/2015 |
| 36 | <i>Auricularia subglabra</i> TFB-10046 SS5                     | Agaricomycetes        | Opisthokonta | 29/09/2015 |
| 37 | <i>Cryptococcus neoformans</i> var. <i>grubii</i> H99          | Tremellomycetes       | Opisthokonta | 29/09/2015 |
| 38 | <i>Ustilago maydis</i> 521                                     | Ustilaginomycetes     | Opisthokonta | 29/09/2015 |
| 39 | <i>Puccinia graminis</i> f. sp. <i>tritici</i> CRL 75-36-700-3 | Pucciniomycetes       | Opisthokonta | 29/09/2015 |
| 40 | <i>Batrachochytrium dendrobatidis</i> JAM81                    | Chytridiomycota       | Opisthokonta | 29/09/2015 |
| 41 | <i>Encephalitozoon intestinalis</i> ATCC 50506                 | Microsporidia         | Opisthokonta | 29/09/2015 |
| 42 | <i>Entamoeba histolytica</i> HM-1:IMSS                         | Archamoebae           | Amoebozoa    | 16/09/2015 |
| 43 | <i>Acytostelium subglobosum</i> LB1                            | Mycetozoa             | Amoebozoa    | 28/09/2017 |
| 44 | <i>Dictyostelium discoideum</i> AX4                            | Mycetozoa             | Amoebozoa    | 14/09/2015 |
| 45 | <i>Polysphondylium pallidum</i> PN500                          | Mycetozoa             | Amoebozoa    | 28/09/2017 |
| 46 | <i>Trypanosoma brucei gambiense</i> DAL972                     | Kinetoplastid         | Excavata     | 28/09/2015 |
| 47 | <i>Leishmania major</i> strain Friedlin                        | Kinetoplastid         | Excavata     | 28/09/2015 |
| 48 | <i>Naegleria gruberi</i> strain NEG-M                          | Heterolobosean        | Excavata     | 28/09/2015 |
| 49 | <i>Trichomonas vaginalis</i> G3                                | Parabasalid           | Excavata     | 28/09/2015 |
| 50 | <i>Giardia lamblia</i> ATCC 50803                              | Diplomonad            | Excavata     | 28/09/2015 |
| 51 | <i>Plasmodium falciparum</i> 3D7                               | Apicomplexan          | SAR          | 13/04/2017 |
| 52 | <i>Theileria parva</i> strain Muguga                           | Apicomplexan          | SAR          | 28/09/2015 |
| 53 | <i>Babesia bovis</i> T2Bo                                      | Apicomplexan          | SAR          | 28/09/2017 |
| 54 | <i>Toxoplasma gondii</i> ME49                                  | Apicomplexan          | SAR          | 13/04/2017 |
| 55 | <i>Cryptosporidium hominis</i> TU502                           | Apicomplexan          | SAR          | 28/09/2015 |

|    |                                               |                  |                |            |
|----|-----------------------------------------------|------------------|----------------|------------|
| 56 | <i>Paramecium tetraurelia strain d4-2</i>     | Ciliate          | SAR            | 28/09/2017 |
| 57 | <i>Tetrahymena thermophila SB210</i>          | Ciliate          | SAR            | 16/09/2015 |
| 58 | <i>Phytophthora infestans T30-4</i>           | Oomycete         | SAR            | 16/09/2015 |
| 59 | <i>Phaeodactylum tricornutum CCAP 1055/1</i>  | Diatom           | SAR            | 16/09/2015 |
| 60 | <i>Thalassiosira pseudonana CCMP1335</i>      | Diatom           | SAR            | 16/09/2015 |
| 61 | <i>Bigelowiella natans CCMP2755</i>           | Rhizaria         | SAR            | 02/11/2017 |
| 62 | <i>Cyanophora paradoxa</i>                    | Glaucophyta      | Archaeplastida | 27/10/2017 |
| 63 | <i>Chondrus crispus</i>                       | Red alga         | Archaeplastida | 03/10/2017 |
| 64 | <i>Cyanidioschyzon merolae strain 10D</i>     | Red alga         | Archaeplastida | 16/10/2017 |
| 65 | <i>Chlamydomonas reinhardtii</i>              | Green alga       | Archaeplastida | 30/09/2015 |
| 66 | <i>Volvox carteri f. nagariensis</i>          | Green alga       | Archaeplastida | 16/10/2017 |
| 67 | <i>Physcomitrella patens</i>                  | Moss             | Archaeplastida | 16/10/2017 |
| 68 | <i>Marchantia polymorpha subsp. ruderalis</i> | Liverwort        | Archaeplastida | 18/10/2017 |
| 69 | <i>Amborella trichopoda</i>                   | Basal Angiosperm | Archaeplastida | 18/10/2017 |
| 70 | <i>Oryza sativa Japonica Group</i>            | Rice             | Archaeplastida | 30/09/2015 |
| 71 | <i>Zea mays</i>                               | Maize            | Archaeplastida | 16/10/2017 |
| 72 | <i>Arabidopsis thaliana</i>                   | Thale cress      | Archaeplastida | 30/09/2015 |
| 73 | <i>Glycine max</i>                            | Soybean          | Archaeplastida | 16/10/2017 |

The table includes the list of organisms chosen for this study along with the phylum/class/common name, the eukaryotic supergroup to which the organism belongs and the date on which the proteomes were downloaded.
